# Supplementary material for: Omnipresence of Partitiviruses in Rice Aggregate Sheath Spot Symptom-Associated Fungal Isolates from Paddies in Thailand
Source: MDPI journal article supplement (doi:10.3390/v13112269), 2021-11-12
Supplement: s1 [file s1]

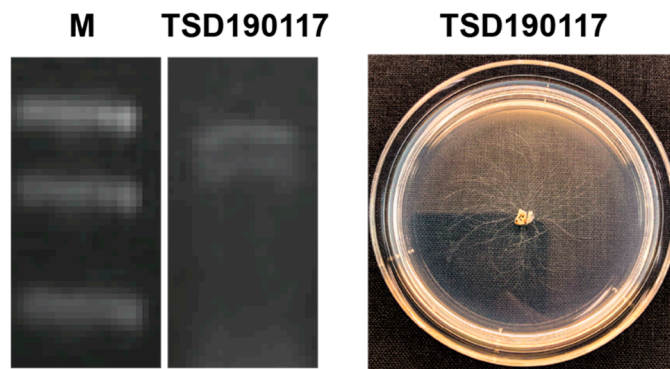

**Figure S1.** dsRNA profile and colony morphology of *Rhizoctonia solani* TSD190117. Strain TSD190117 exhibits severe growth reduction which might be associated with the presence of dsRNA with the estimated length of  $\geq 2$  kbp. The bands appeared on the left panel indicate molecular size marker of dsDNAs (2.5, 2.0 and 15 kbp, downward).

**Table S1.** List of primers used in this study.

| Primer names          | DNA sequences            |
|-----------------------|--------------------------|
| ITS4                  | TCCTCCGCTTATTGATATGC     |
| ITS5                  | GGAAGTAAAAGTCGTAACAAGG   |
| dN6                   | CCTGAATTCGGATCCTCCNNNNNN |
| Amp                   | CCTGAATTCGGATCCTCC       |
| RACE PV1T442-CP5'-R   | CTGACGCAGATAAGCGTGCT     |
| RACE PV1T442-CP3'-F   | GCGTAACCTGGAACGTGCAT     |
| RACE PV1T442-RdRp5'-R | GGGTTATCGCTAGTGTTTGGC    |
| RACE PV1T442-RdRp3'-F | TTGATCAACGTCGGATCGTCG    |
| RACE PV2T442-CP5'-R   | CCTTCCTTGGTGAATTTGGC     |
| RACE PV2T442-CP3'-F   | GGTAAATGGCAGGGTCAGC      |
| RACE PV2T442-RdRp3'-F | TGCGCTTCAGCGAATAGATC     |
| RACE PV2T442-RdRp5'-R | GGAAGTGGATGTGTGACTCC     |
| RACE PV3T505-CP5'-R   | GAATGGTTCTGCTGCTGCTG     |
| RACE PV3T505-CP3'-F   | GAGCGTAATTCTTGCCTTTAGC   |
| RACE PV3T505-RdRp5'-R | GGTTCGCCTACGCTAGTTG      |
| RACE PV3T505-RdRp3'-F | ATCAGGGAAGAGAACAGCGC     |
| RACE PV4T123-RdRp5'-R | GTCGAAAGGTTGACGTTGC      |
| RACE PV4T123-RdRp3'-F | GGTATTCGGAACTCACCTGAC    |
| RACE PV4T123-CP5'-R   | GTCGTCATCATCTTCTGGTCG    |
| RACE PV4T123-CP3'-F   | CCTTCTGGGAAGTCACCGAC     |
| RACE PV5T123-RdRp5'-R | GTTTAGCTTGTGAGCCAGGC     |
| RACE PV5T123-RdRp3'-F | CCAAGCTAGCATGGGATGCA     |
| RACE PV5T123-CP5'-R   | GGCCTGTCTAGCTTGTGCAG     |
| RACE PV5T123-CP3'-F   | GTTGGTGAAATCCCTGAATCTGG  |
| RACE PV6T123-RdRp5'-R | GGTCACCCTTTCGTAAAGCTTC   |
| RACE PV6T123-RdRp3'-F | GCTGCGGTATCGCATATGC      |
| RACE PV6T123-CP5'-R   | TCAGCGTCATCCTTTCCAGC     |
| RACE PV6T123-CP3'-F   | CCTCGTTCACTACCGATCGC     |

**Table S2.** BLASTn analysis of the fungal ITS fragments and the presence of dsRNAs.

| Species                           | Isolate    | Blastn    |              | DsRNA presence | Species                           | Isolate    | Blastn    |              | DsRNA presence |
|-----------------------------------|------------|-----------|--------------|----------------|-----------------------------------|------------|-----------|--------------|----------------|
|                                   |            | Query (%) | Identity (%) |                |                                   |            | Query (%) | Identity (%) |                |
| <i>Rhizoctonia oryzae-sativae</i> | TSD 190101 | 99        | 99.41        |                | <i>Gaeumannomyces oryzae</i>      | TSD 190104 | 100       | 99.64        |                |
|                                   | TSD 190102 | 100       | 99.44        |                |                                   | TSD 190105 | 99        | 99.13        |                |
|                                   | TSD 190103 | 100       | 99.58        | √              |                                   | TSD 190130 | 99        | 99.82        |                |
|                                   | TSD 190106 | 100       | 99.85        | √              |                                   | TSD 190138 | 100       | 99.63        |                |
|                                   | TSD 190107 | 99        | 99.86        |                |                                   | TSD 190143 | 99        | 99.64        |                |
|                                   | TSD 190108 | 100       | 99.3         | √              | <i>Fusarium proliferatum</i>      | TSD 190120 | 100       | 99.81        |                |
|                                   | TSD 190111 | 100       | 99.3         |                |                                   | TSS 190541 | 100       | 100          |                |
|                                   | TSD 190113 | 100       | 99.44        | √              |                                   | TSS 190545 | 100       | 100          |                |
|                                   | TSD 190118 | 99        | 98.88        |                |                                   | TSS 190550 | 100       | 100          |                |
|                                   | TSD 190119 | 100       | 99.44        | √              | <i>Rhizoctonia oryzae</i>         | TSS 190517 | 99        | 93.92        | √              |
|                                   | TSD 190123 | 100       | 99.58        | √              |                                   | TSS 190523 | 100       | 99.23        |                |
|                                   | TSD 190124 | 98        | 99.29        |                |                                   | TSS 190528 | 100       | 99.13        |                |
|                                   | TSD 190125 | 98        | 99.86        | √              |                                   |            |           |              |                |
|                                   | TSD 190129 | 100       | 99.44        |                | <i>Achroostachys saccharicola</i> | TSS 190509 | 99        | 99.3         |                |
|                                   | TSD 190132 | 99        | 99.3         |                |                                   | TSS 190514 | 99        | 99.65        |                |
|                                   | TSD 190133 | 98        | 99.3         | √              |                                   | TSS 190529 | 99        | 99.82        |                |
|                                   | TSD 190136 | 97        | 98.45        | √              |                                   |            |           |              |                |
|                                   | TSD 190137 | 98        | 99.43        |                | <i>Nigrospora oryzae</i>          | TSD 190144 | 99        | 98.88        | √              |
|                                   | TSD 190140 | 100       | 99.4         |                |                                   | TSD 190210 | 99        | 99.82        |                |
|                                   | TSD 190142 | 96        | 99.86        |                |                                   | TSS 190532 | 84        | 100          |                |
|                                   | TSD 190145 | 99        | 99.43        |                |                                   |            |           |              |                |
|                                   | TSD 190202 | 100       | 99.55        |                | <i>Nigrospora sphaerica</i>       | TSD 190109 | 99        | 97.57        | √              |
|                                   | TSM 190304 | 100       | 93.58        |                |                                   | TSD 190206 | 99        | 99.09        |                |
|                                   | TSM 190305 | 99        | 99.71        |                |                                   |            |           |              |                |
|                                   | TSM 190306 | 95        | 90.65        |                | <i>Sclerotium hydrophilum</i>     | TSD 190209 | 78        | 84.9         |                |
|                                   | TSM 190307 | 86        | 84.05        |                |                                   | TSD 190301 | 99        | 95.99        |                |
|                                   | TSM 190309 | 100       | 99.71        |                |                                   |            |           |              |                |
|                                   | TSS 190401 | 100       | 86.81        | √              | <i>Stachybotrys cf. elegans</i>   | TSS 190548 | 99        | 100          |                |
|                                   | TSS 190436 | 99        | 99.3         |                |                                   | TSS 190542 | 99        | 99.06        |                |
|                                   | TSS 190437 | 85        | 83.03        |                |                                   |            |           |              |                |
|                                   | TSS 190440 | 86        | 84.5         |                | <i>Setosphaeria rostrata</i>      | TSS 190415 | 99        | 99.35        |                |
|                                   | TSS 190442 | 89        | 85.6         | √              |                                   | TSS 190537 | 99        | 100          |                |
|                                   | TSS 190505 | 96        | 99.72        | √              |                                   |            |           |              |                |
|                                   | TSS 190508 | 98        | 99.15        |                | <i>Fusarium incarnatum</i>        | TSD 190114 | 99        | 99.82        |                |
|                                   | TSS 190538 | 97        | 98.59        |                |                                   |            |           |              |                |
|                                   | TSS 190551 | 100       | 99.85        |                | <i>Fusarium equiseti</i>          | TSS 190526 | 100       | 100          |                |
|                                   | TSS 190554 | 100       | 99.44        |                |                                   |            |           |              |                |
| <i>Rhizoctonia solani</i>         | TSD 190117 | 100       | 89.52        | √              | <i>Fusarium sacchari</i>          | TSS 190539 | 99        | 100          |                |
|                                   |            |           |              |                |                                   |            |           |              |                |
| <i>Rhizoctonia zeae</i>           | TSS 190513 | 89        | 85.6         | √              | <i>Bipolaris oryzae</i>           | TSS 190434 | 100       | 100          |                |
|                                   |            |           |              |                |                                   |            |           |              |                |
| <i>Bipolaris sirobasiana</i>      | TSD 190127 | 100       | 99.67        |                | <i>Curvularia beasleyi</i>        | TSS 190515 | 100       | 99.65        |                |
|                                   | TSS 190406 | 99        | 99.67        |                |                                   |            |           |              |                |
|                                   | TSS 190409 | 99        | 99.67        |                | <i>Simplicillium lamellicola</i>  | TSM 190303 | 99        | 99.68        |                |
|                                   | TSS 190413 | 99        | 99.51        |                |                                   |            |           |              |                |
|                                   | TSS 190435 | 99        | 99.67        |                | <i>Sarocladium oryzae</i>         | TSS 190440 | 97        | 99.83        |                |
|                                   | TSS 190439 | 99        | 99.5         |                |                                   |            |           |              |                |
|                                   |            |           |              |                |                                   |            |           |              |                |

**Table S3.** Full name and acronym of viruses used in phylogenetic analyses.

| Acronym | Name                                           | Accession number |              |
|---------|------------------------------------------------|------------------|--------------|
|         |                                                | RdRp             | CP           |
| HetPV1  | Heterobasidion RNA virus 1                     | YP_009508049     | YP_009508050 |
| HetPV2  | Heterobasidion partitivirus 2                  | YP_009508061     | YP_009508062 |
| RfPV    | Rhizoctonia fumigata partitivirus              | AJE25830         | AJE25831     |
| RsPV4   | Rhizoctonia dsRNA virus 4                      | ATN23967         | ATN23968     |
| WCCV1   | White clover cryptic virus 1                   | Q64FP0           | Q64FN9       |
| CCV     | Carrot cryptic virus                           | YP_009508046     | YP_009508045 |
|         |                                                | YP_002308574     | YP_002308575 |
| BCV1    | Beet cryptic virus 1                           |                  |              |
| RnPV9   | Rosellinia necatrix partitivirus 9             | BBB86797         | BBB86798     |
| CpCV1   | Chondrostereum purpureum cryptic virus 1       |                  | YP_009508235 |
|         |                                                | YP_009508236     |              |
| FvBv    | Flammulina velutipes browning virus            | YP_009508048     | YP_009508047 |
| MsAPV2  | Medicago sativa alphapartitivirus 2            | QBC36014         | QBC36015     |
| RosPV1  | Rhizoctonia oryzae-sativae partitivirus 1      | AYV61425         | AYV61426     |
| HetRV2  | Heterobasidion partitivirus 2                  | YP_009508061     | YP_009508062 |
| AHV2H   | Atkinsonella hypoxylon virus isolate 2H        | Q85055           | Q85056       |
| RsPV6   | Rhizoctonia solani partitivirus 6              | QGA67322         | QGA67323     |
| SaPV1   | Sodiomyces alkalinus partitivirus 1            | ATQ64297         | ATQ64296     |
| RnPV8   | Rosellinia necatrix partitivirus 8             | BBC21044         | BBC21045     |
| PoV1    | Pleurotus ostreatus virus 1                    | YP_227355        | YP_227354    |
| DCV2    | Dill cryptic virus 2                           | YP_007891054     | YP_007891055 |
| CCCV2   | Crimson clover cryptic virus 2                 | YP_009508059     | YP_009508060 |
| RCCV2   | Red clover cryptic virus 2                     | YP_007889823     | YP_007889824 |
| HTCV2   | Hop trefoil cryptic virus 2                    | YP_007889825     | YP_007889826 |
| FCV     | Fig cryptic virus                              | YP_004429258     | YP_004429259 |
| BCV2    | Beet cryptic virus 2                           | QCF59322         | QCF59321     |
| BCV3    | Beet cryptic virus 3                           | YP_009665971     | N/A          |
| PCV1    | Pepper cryptic virus 1                         | YP_009466859     | YP_009466860 |
| PCV2    | Pepper cryptic virus 2                         | YP_009351838     | YP_009351848 |
| WcV2    | Wuhan cricket virus 2                          | KX884243         | KX884245     |
| HplV11  | Hubei partiti-like virus 11                    | YP_009329875     | YP_009329874 |
| BsPV3   | Beauveria bassiana partitivirus 3              | MN116721         | MN116720     |
| CePV1   | Colletotrichum eremochloae partitivirus 1      | AZT88590         | AZT88591     |
| PaP-LV1 | Penicillium aurantiogriseum partiti-like virus | KT601103         | KT601104     |

|         |                                        |                           |              |
|---------|----------------------------------------|---------------------------|--------------|
| CSpV1   | Cryptosporidium parvum virus 1         | O15925                    | O15926       |
| PsV-F   | Penicillium stoloniferum virus F       | YP_271922                 | YP_271923    |
| FsV1    | Fusarium solani virus 1                | NP_624350                 | NP_624351    |
| PsV-S   | Penicillium stoloniferum virus S       | YP_052856                 | YP_052857    |
| AoV     | Aspergillus ochraceous virus           | YP_009665972              | YP_009665973 |
| GaRVMS1 | Gremmeniella abietina RNA virus MS1    | NP_659027                 | NP_659028    |
| OPV1    | Ophiostoma partitivirus 1              | YP_009508238<br>NP_116716 | YP_009508237 |
| DdV1    | Discula destructiva virus 1            |                           | NP_116742    |
| BdPV1   | Botryosphaeria dothidea partitivirus 1 | AGZ84316                  | AGZ84317     |
| FePV1   | Fusarium equiseti partitivirus 1       | MT659122                  | MT659123     |
| AfPV2   | Aspergillus flavus partitivirus 2      | UAW09571                  | UAW09572     |
| AtPV1   | Alternaria alternata partitivirus 1    | KY352402                  | KY352403     |
| EfPV1   | Epichloe festucae virus 1              | YP_009508253              | YP_009508252 |
| MoV1    | Magnaporthe oryzae virus 1             | YP_122352                 | YP_122351    |

N/A Not available.

**Table S4.** dsRNA detection during the partitivirus-curing experiment.

| Stage                           | Method                              | Partitivirus detection<br>(Pos/Total) |                          | Total colonies <sup>e</sup> |
|---------------------------------|-------------------------------------|---------------------------------------|--------------------------|-----------------------------|
|                                 |                                     | 5 mg/L<br>cycloheximide               | 10 mg/L<br>cycloheximide |                             |
| Screening <sup>a</sup>          | 1-step colony RT-PCR                | 4/24                                  | 3/23                     | 47                          |
| Confirmation I <sup>b</sup>     | dsRNA extraction                    | 3/18                                  | 2/19                     | 37                          |
| Confirmation II <sup>c</sup>    | 1-step colony RT-PCR                | 4/14                                  | 1/17                     | 31                          |
| Final verification <sup>d</sup> | dsRNA extraction<br>(more mycelium) | 0/10                                  | 0/16                     | 26                          |

<sup>a</sup> Hyphal tipping was repeated five times, and the sixth hyphal tips were transferred to individual PDA plate, maintained for 5 d then subjected to RosPV1 and 2 detections.

<sup>b</sup> 200 mg of mycelium were used for dsRNA extraction for partitivirus infection.

<sup>c</sup> dsRNA negative variants were cultured on PDA for 10 d then subjected to another RosPV1 and 2 detections.

<sup>d</sup> 4 g of mycelium were used for dsRNA extraction for final confirmation of virus-cured variants.

<sup>e</sup> Total number of colonies tested in each stage.
